# Supplementary material
Source: Springer Nature journal article supplement (https://www.springermedizin.de/resource/supplementary/12936_2007_423_MOESM1_ESM.pdf/9547414)
Supplement: MOESM1 [file 9547414]

## **World Antimalarial Resistance Network (WARN) I: Clinical efficacy of antimalarial therapy**

Provides a rationale and plan for developing a comprehensive open-access database containing individual patient data from clinical trials of antimalarial drugs to identify global trends in therapeutic efficacy

## **World Antimalarial Resistance Network (WARN) II: In vitro antimalarial drug susceptibility**

Describes the creation of a global network of laboratories for in vitro monitoring of antimalarial drug susceptibility and highlights the critical role of in vitro surveillance to detect emergence of resistance to artemisinins and ACT partner drugs

## **World Antimalarial Resistance Network (WARN) III: Molecular markers for drug resistant malaria**

Provides a rationale and plan for developing a global database for molecular resistance markers to help guide choices of first-line drugs and to accelerate the identification and validation of new markers of resistance to artemisinins and ACT partner drugs

## **World Antimalarial Resistance Network (WARN) IV: Clinical pharmacology**

Describes the need for a network of reference laboratories and pooled pharmacokinetic-pharmacodynamic data to distinguish whether treatment failure is due to inadequate drug levels or to intrinsic parasite resistance
